# Supplementary material
Source: HighWire-hosted journal article supplement (https://www.life-science-alliance.org/content/6/5/e202201702/F6)
Supplement: inline-supplementary-material-2 [file inline-supplementary-material-2.pdf]

Figure 2C

# OD490

|            |         | Day0   |        |        |        |        |        |  |
|------------|---------|--------|--------|--------|--------|--------|--------|--|
| GA (ug/ml) | Control | 0.1752 | 0.1753 | 0.1603 | 0.1439 | 0.1234 | 0.1173 |  |
|            | 0       | 0.185  | 0.174  | 0.1627 | 0.1529 | 0.1354 | 0.1211 |  |
|            | 100     | 0.21   | 0.1892 | 0.1701 | 0.1692 | 0.1513 | 0.1223 |  |
|            | 50      | 0.1923 | 0.1743 | 0.1636 | 0.1578 | 0.1368 | 0.121  |  |
|            | 20      | 0.2125 | 0.194  | 0.1772 | 0.1578 | 0.1468 | 0.1272 |  |
|            | 10      | 0.2119 | 0.1988 | 0.1816 | 0.1624 | 0.1472 | 0.1292 |  |
|            | 5       | 0.197  | 0.1872 | 0.1829 | 0.1556 | 0.1459 | 0.1361 |  |
|            | 2.5     | 0.1961 | 0.1793 | 0.1634 | 0.1477 | 0.1375 | 0.1297 |  |
|            | 1.2     | 0.1852 | 0.1811 | 0.1691 | 0.1371 | 0.1203 | 0.1254 |  |
|            | 0.6     | 0.2002 | 0.2011 | 0.1817 | 0.1558 | 0.14   | 0.1279 |  |
|            | 0.3     | 0.2382 | 0.1949 | 0.1754 | 0.1657 | 0.1625 | 0.1568 |  |
| 0.15       | 0.2171  | 0.2146 | 0.1703 | 0.1666 | 0.1542 | 0.1457 |        |  |

  

|            |         | Day1   |        |        |        |        |        |  |
|------------|---------|--------|--------|--------|--------|--------|--------|--|
| GA (ug/ml) | Control | 0.3293 | 0.3075 | 0.2518 | 0.2539 | 0.2503 | 0.2742 |  |
|            | 0       | 0.3386 | 0.2791 | 0.2366 | 0.2366 | 0.2313 | 0.2574 |  |
|            | 100     | 0.1227 | 0.1199 | 0.1167 | 0.1125 | 0.1095 | 0.105  |  |
|            | 50      | 0.1779 | 0.1836 | 0.1343 | 0.1149 | 0.1508 | 0.1446 |  |
|            | 20      | 0.2859 | 0.2487 | 0.2189 | 0.2004 | 0.2292 | 0.2237 |  |
|            | 10      | 0.3043 | 0.2523 | 0.2319 | 0.2041 | 0.2266 | 0.2503 |  |
|            | 5       | 0.3299 | 0.2867 | 0.2594 | 0.2631 | 0.2446 | 0.2574 |  |
|            | 2.5     | 0.3227 | 0.2966 | 0.2809 | 0.2873 | 0.2739 | 0.2543 |  |
|            | 1.2     | 0.3602 | 0.2239 | 0.2675 | 0.2374 | 0.2541 | 0.2378 |  |
|            | 0.6     | 0.2994 | 0.2065 | 0.264  | 0.2655 | 0.2572 | 0.296  |  |
|            | 0.3     | 0.3071 | 0.2147 | 0.2653 | 0.2764 | 0.2698 | 0.2434 |  |
| 0.15       | 0.3404  | 0.2385 | 0.2579 | 0.2705 | 0.2968 | 0.3215 |        |  |

  

|            |         | Day2   |        |        |        |        |        |  |
|------------|---------|--------|--------|--------|--------|--------|--------|--|
| GA (ug/ml) | Control | 0.5184 | 0.449  | 0.3453 | 0.3545 | 0.4066 | 0.4529 |  |
|            | 0       | 0.2777 | 0.293  | 0.2818 | 0.3016 | 0.3161 | 0.3184 |  |
|            | 100     | 0.1368 | 0.1342 | 0.1291 | 0.1374 | 0.1235 | 0.1308 |  |
|            | 50      | 0.2274 | 0.2145 | 0.2241 | 0.2075 | 0.2564 | 0.2541 |  |
|            | 20      | 0.3388 | 0.326  | 0.3437 | 0.3406 | 0.3575 | 0.3959 |  |
|            | 10      | 0.3441 | 0.3309 | 0.3571 | 0.3609 | 0.3363 | 0.3963 |  |
|            | 5       | 0.3234 | 0.3273 | 0.2944 | 0.2852 | 0.334  | 0.3497 |  |
|            | 2.5     | 0.3356 | 0.3298 | 0.3023 | 0.3001 | 0.2172 |        |  |
|            | 1.2     | 0.2998 | 0.304  | 0.2702 | 0.2875 | 0.3327 | 0.2545 |  |
|            | 0.6     |        | 0.3355 | 0.3099 | 0.2808 | 0.3248 | 0.2914 |  |
|            | 0.3     |        | 0.2828 | 0.3285 | 0.2918 | 0.3088 | 0.2972 |  |
| 0.15       |         | 0.2832 | 0.3255 | 0.3202 | 0.3536 | 0.2684 |        |  |

Figure 2E

| Tannase activity (U/g) |      |      |      |      |      |      |
|------------------------|------|------|------|------|------|------|
| Comtral                | 30.6 | 0    | 0    | 0    | 0    | 59   |
| TA50                   | 84.1 | 214  | 109  | 965  | 1259 |      |
| TA250                  | 1392 | 1399 | 1848 | 1644 | 1511 | 1133 |

Figure 2F

| Colon tissue (ug/0.1g tissue) |           |           |           |
|-------------------------------|-----------|-----------|-----------|
|                               | Mouse 1   | Mouse 2   | Mouse 3   |
| GA0                           | 0         | 0         | 0.1795672 |
| GA50                          | 0.6803096 | 0.3902161 | 0.3526921 |
| GA250                         | 1.081272  | 1.6517032 | 2.4556365 |

  

| Feces (ug/0.1g feces) |           |           |           |
|-----------------------|-----------|-----------|-----------|
|                       | Mouse 1   | Mouse 2   | Mouse 3   |
| GA0                   | 0.0025463 | 0.0074338 | 0.0014276 |
| GA50                  | 0.3652352 | 0.2482473 | 0.2622723 |
| GA250                 | 0.8401149 | 0.7068388 | 0.5031606 |
